# Supplementary material for: Association between rehabilitation after reperfusion treatment and in-hospital mortality: Results from a national registry study
Source: PubMed Central journal article supplement (PMC9515317; doi:10.3389/fneur.2022.949669), 2022-09-14

## Supplementary Online Content

TableS1. Definitions of key variables

TableS2. Missing data of primary outcome in thrombolysis-only and EVT groups.

TableS3. Missing data of variables in thrombolysis-only and EVT groups.

TableS4. Missing data of follow up time in thrombolysis-only and EVT groups

TableS5. Demographic and clinical characteristics of patients with thrombolysis-only and endovascular therapy

TableS6. The structure and contents of IRT in thrombolysis-only and EVT groups

TableS7. Demographic and clinical characteristics of patients with thrombolysis-only and endovascular therapy after PSM

TableS8. HRs for all-cause in-hospital mortality in subgroup analyses in patients with only thrombolysis and EVT

TableS9. Clinical characteristics of patients with initial NIHSS score  $\geq 21$

TableS10. Sensitivity analyses of Cox regression models in patients with only thrombolysis

TableS11. Sensitivity analyses of Cox regression models in patients with EVT

TableS12. Confounders of Cox regression model in thrombolysis-only group

TableS13. Confounders of Cox regression model in EVT group

FigureS1. Data source of our study

FigureS2. The distribution of propensity scores in unmatched and matched patients in thrombolysis-only group

FigureS3. The distribution of propensity scores in unmatched and matched patients in EVT group

**TableS1. Definitions of key variables <sup>a</sup>**

| Variable                          | Definition                                                                                                                                                                                                                                                                                                      | Note                                                                                                                                                                                                                                                                                                       |
|-----------------------------------|-----------------------------------------------------------------------------------------------------------------------------------------------------------------------------------------------------------------------------------------------------------------------------------------------------------------|------------------------------------------------------------------------------------------------------------------------------------------------------------------------------------------------------------------------------------------------------------------------------------------------------------|
| Drugs of intravenous thrombolysis | (1) Standard r-tPA (0.85-0.95mg/kg);<br>(2) Suboptimal r-tPA (<0.85mg/kg or > 0.95mg/kg);<br>(3) Unknown r-tPA (Without documented r-tPA dosage per kg);<br>(4) Other drugs: including urokinase, anistreplase, reteplase, tenecteplase, and recombinant human pro-urokinase.                                   | NA                                                                                                                                                                                                                                                                                                         |
| $\Delta$ NIHSS24h                 | $\Delta$ NIHSS24h=initial NIHSS score–NIHSS score at 24 hours after reperfusion procedure.                                                                                                                                                                                                                      | NA                                                                                                                                                                                                                                                                                                         |
| Change of NIHSS score at 24 hour  | (1) Moderate-severe deterioration, $\Delta$ NIHSS24h $\leq$ -4;<br>(2) Mild deterioration, $-3 \leq \Delta$ NIHSS24h $\leq$ -1;<br>(3) Stable status, $\Delta$ NIHSS24h=0;<br>(4) Mild improvement, $1 \leq \Delta$ NIHSS24h $\leq$ 7;<br>(5) Rapid neurological improvement (RNI), $\Delta$ NIHSS24h $\geq$ 8. | NA                                                                                                                                                                                                                                                                                                         |
| Change of NIHSS score at 24 hour  | (1)Severe deterioration ( $\Delta$ NIHSS24h $\leq$ -9);<br>(2)Non-severe deterioration ( $\Delta$ NIHSS24h $\geq$ -8).                                                                                                                                                                                          | Another subtypes of $\Delta$ NIHSS24h.                                                                                                                                                                                                                                                                     |
| Reperfusion status after EVT      | (1) Poor: modified TICI score of 0, 1, or 2a;<br>(2) Good: modified TICI score of 2b or 3;<br>(3)Unknown: without documented modified TICI score. <sup>1</sup>                                                                                                                                                  | NA                                                                                                                                                                                                                                                                                                         |
| Procedure of EVT                  | (1) Bridging thrombolysis (BT), EVT with intravenous thrombolysis;<br>(2) Direct EVT: EVT without intravenous thrombolysis.                                                                                                                                                                                     | NA                                                                                                                                                                                                                                                                                                         |
| Hospital levels: 3 levels         | (1) class A: Tertiary A hospitals;<br>(2) class B: tertiary-B or tertiary-C or undetermined tertiary hospitals;<br>(3) class C, secondary and primary hospitals.                                                                                                                                                | All hospitals in China were graded by the National Health Commission with standard criteria as primary, secondary, and tertiary hospitals, and A-B-C sub-levels in each group, mainly based on the quality of medical care and management. Tertiary A represents the highest level in this grading system. |

|                             |                                                                                                                                                                          |    |
|-----------------------------|--------------------------------------------------------------------------------------------------------------------------------------------------------------------------|----|
| Covid19 pandemic: 2 periods | (1)“Before Covid19 pandemic” covered date from January 1, 2019 to January 22, 2020;<br>(2)“During Covid19 pandemic” covered date from January 23, 2020 to June 30, 2020. | NA |
| Intracranial hemorrhage     | It was reported after confirmation of computed tomography results and neurological findings, including symptomatic and asymptomatic events.                              | NA |

<sup>a</sup> Details of variables have been published elsewhere.<sup>2,3</sup>

1. Berkhemer OA, Fransen PS, Beumer D, et al. A randomized trial of intraarterial treatment for acute ischemic stroke. *N Engl J Med*. Jan 1 2015;372(1):11-20. doi:10.1056/NEJMoa1411587
2. Chao BH, Yan F, Hua Y, Liu JM, Yang Y, Ji XM, Peng B, Zhao GG, Wang YJ, Kang DZ, et al. Stroke prevention and control system in China: CSPPC-Stroke Program. *Int J Stroke*. 2021;16:265-272. doi: 10.1177/1747493020913557
3. Shen Y, Chao BH, Cao L, Tu WJ, Wang LD. Stroke Center Care and Outcome: Results from the CSPPC Stroke Program. *Transl Stroke Res*. 2020;11:377-386. doi: 10.1007/s12975-019-00727-6.

**TableS2. Missing data of primary outcome in thrombolysis-only and EVT groups**

a. Thrombolysis-only group

|                 | Overall, n(%) | IRT-, n (%)  | IRT+, n (%)   | P value |
|-----------------|---------------|--------------|---------------|---------|
| With outcome    | 189519 (99.7) | 84275 (99.7) | 105244 (99.6) | <0.0001 |
| Without outcome | 534 (0.3)     | 175 (0.2)    | 359 (0.3)     |         |

b. EVT group

|                 | Overall, n(%) | IRT-, n (%)  | IRT+, n (%)  | P value |
|-----------------|---------------|--------------|--------------|---------|
| With outcome    | 45211 (99.7)  | 14113 (99.7) | 31098 (99.5) | 0.0011  |
| Without outcome | 196 (0.3)     | 40 (0.3)     | 156 (0.5)    |         |

**TableS3. Missing data of variables in thrombolysis-only and EVT groups**

|                                | Thrombolysis-only group |                | EVT group |                |
|--------------------------------|-------------------------|----------------|-----------|----------------|
|                                | Number                  | Percentage (%) | Number    | Percentage (%) |
| Age                            | 0                       | 0              | 0         | 0              |
| Sex                            | 5                       | 0              | 1         | 0              |
| Nationality                    | 0                       | 0              | 0         | 0              |
| Region                         | 0                       | 0              | 0         | 0              |
| Hospital level                 | 29                      | 0.02           | 1         | 0              |
| Systolic pressure at admission | 38                      | 0.03           | 8         | 0.02           |
| BMI                            | 12667                   | 6.5            | 4216      | 9.3            |
| TOAST                          | 33                      | 0.02           | 20        | 0.04           |
| Reperfusion time               | 2527                    | 1.3            | 2500      | 5.5            |
| Thrombolysis drug              | 0                       | 0              | -         | -              |
| mTICI after EVT                | -                       | -              | 0         | 0              |
| Initial NIHSS score            | 1790                    | 0.9            | 1707      | 3.8            |
| Initial mRS                    | 31947                   | 16.9           | 6702      | 14.8           |
| NIHSS score at 24h             | 15636                   | 8.3            | 8109      | 17.9           |
| $\Delta$ NIHSS24h              | 16235                   | 8.6            | 8732      | 19.3           |
| Intracranial hemorrhage        | 5                       | 0              | 43        | 0.1            |
| Gastrointestinal hemorrhage    | 5                       | 0              | 43        | 0.1            |
| Antiplatelet therapy           | 0                       | 0              | 0         | 0              |
| Statin therapy                 | 6912                    | 3.6            | 2880      | 6.4            |
| Covid19 pandemic               | 0                       | 0              | 0         | 0              |
| Duration of follow up          | 116                     | 0.1            | 81        | 0.2            |

Abbreviations: BMI, body mass index; EVT, Endovascular therapy;

**TableS4. Missing data of follow up time in thrombolysis-only and EVT groups**

## a. Thrombolysis-only group

|                        | IRT-, n (%)   | IRT+, n (%)    | P value |
|------------------------|---------------|----------------|---------|
| With follow up time    | 84210 (99.92) | 105193 (99.95) | 0.0122  |
| Without follow up time | 65 (0.08)     | 51 (0.05)      |         |

## b. Patient with death in thrombolysis-only group

|                        | IRT-, n (%) | IRT+, n (%) | P value |
|------------------------|-------------|-------------|---------|
| With follow up time    | 1866 (97.8) | 640 (96.0)  | 0.011   |
| Without follow up time | 42 (2.2)    | 27 (4.0)    |         |

## c. EVT group

|                        | IRT-, n (%)  | IRT+, n (%)  | P value |
|------------------------|--------------|--------------|---------|
| With follow up time    | 14065 (99.7) | 31065 (99.9) | <0.0001 |
| Without follow up time | 48 (0.3)     | 33 (0.1)     |         |

## d. Patient with death in EVT group

|                        | IRT-, n (%) | IRT+, n (%) | P value |
|------------------------|-------------|-------------|---------|
| With follow up time    | 1667 (97.7) | 609 (96.1)  | 0.0363  |
| Without follow up time | 40 (2.3)    | 25 (3.9)    |         |

**TableS5. Demographic and clinical characteristics of patients with thrombolysis-only and endovascular therapy**

|                                       | Thrombolysis-only group <sup>a</sup> |               |               |         | Endovascular therapy group <sup>a</sup> |               |               |         |
|---------------------------------------|--------------------------------------|---------------|---------------|---------|-----------------------------------------|---------------|---------------|---------|
|                                       | Overall                              | Without IRT   | With IRT      | P value | Overall                                 | Without IRT   | With IRT      | P value |
| Patients                              | 189519                               | 84275 (44.5)  | 105244 (55.5) |         | 45211                                   | 14113 (31.2)  | 31098 (68.8)  |         |
| Age group, y                          |                                      |               |               | <0.0001 |                                         |               |               | 0.0002  |
| 14-40                                 | 4037 (2.1)                           | 2015 (2.4)    | 20242 (1.9)   |         | 1501 (3.3)                              | 431 (3.1)     | 1070 (3.4)    |         |
| 41-60                                 | 57111 (30.1)                         | 26646 (31.6)  | 30465 (29.0)  |         | 13426 (29.7)                            | 4096 (29.0)   | 9330 (30.0)   |         |
| 61-70                                 | 61303 (32.3)                         | 27369 (32.5)  | 33934 (32.2)  |         | 14489 (32.1)                            | 4528 (32.1)   | 9961 (32.0)   |         |
| 71-80                                 | 48173 (25.4)                         | 20586 (24.4)  | 27587 (26.2)  |         | 11649 (25.8)                            | 3650 (25.8)   | 7999 (25.7)   |         |
| 81-99                                 | 18895 (10.0)                         | 7659 (9.1)    | 11236 (10.7)  |         | 4146 (9.2)                              | 1408 (10.0)   | 2738 (8.8)    |         |
| Nationality                           |                                      |               |               | 0.1355  |                                         |               |               | 0.0661  |
| Han                                   | 183902 (97.0)                        | 81832 (97.1)  | 102070 (97.0) |         | 44044 (97.4)                            | 13720 (97.2)  | 30324 (97.5)  |         |
| Minority                              | 5617 (3.0)                           | 2443 (2.9)    | 3174 (3.0)    |         | 1167 (2.6)                              | 393 (2.8)     | 774 (2.5)     |         |
| Region                                |                                      |               |               | <0.0001 |                                         |               |               | <0.0001 |
| Northeast                             | 20459 (10.8)                         | 11707 (13.9)  | 8752 (8.3)    |         | 3665 (8.1)                              | 1553 (11.0)   | 2112 (6.8)    |         |
| North                                 | 38937 (20.6)                         | 20493 (24.3)  | 18444 (17.5)  |         | 4372 (9.7)                              | 1797 (12.7)   | 2575 (8.3)    |         |
| East                                  | 53888 (28.4)                         | 22636 (26.9)  | 31252 (29.7)  |         | 15583 (34.5)                            | 4910 (34.8)   | 10673 (34.2)  |         |
| Central                               | 33015 (17.4)                         | 13754 (16.3)  | 19261 (18.3)  |         | 6485 (14.3)                             | 1927 (13.7)   | 4558 (14.7)   |         |
| South                                 | 131080 (6.9)                         | 4195 (5.0)    | 8885 (8.4)    |         | 7576 (16.8)                             | 1855 (13.1)   | 5721 (18.4)   |         |
| Southwest                             | 21398 (11.3)                         | 7909 (9.4)    | 13489 (12.8)  |         | 4993 (11.0)                             | 1324 (9.4)    | 3669 (11.8)   |         |
| Northwest                             | 8742 (4.6)                           | 3581 (4.2)    | 5161 (4.9)    |         | 2537 (5.6)                              | 747 (5.3)     | 1790 (5.8)    |         |
| Systolic pressure at admission (mmHg) | 152 (138-168)                        | 151 (137-167) | 153 (139-168) | <0.0001 | 148 (132-165)                           | 148 (131-165) | 148 (132-164) | 0.2413  |
| Systolic pressure at admission (mmHg) |                                      |               |               | <0.0001 |                                         |               |               | 0.0076  |
| < 160                                 | 115064 (60.7)                        | 52190 (61.9)  | 62874 (59.7)  |         | 30531 (67.5)                            | 9407 (66.7)   | 21124 (67.9)  |         |
| ≥ 160                                 | 74417 (39.3)                         | 32066 (38.1)  | 42351 (40.3)  |         | 14672 (32.5)                            | 4703 (33.3)   | 9969 (32.1)   |         |

|                                              |                  |                  |                  |         |                  |                  |                  |         |
|----------------------------------------------|------------------|------------------|------------------|---------|------------------|------------------|------------------|---------|
| BMI, Kg/m <sup>2</sup>                       | 23.7 (21.4-25.9) | 23.7 (21.5-26.0) | 23.5 (21.3-25.7) | <0.0001 | 23.8 (22.0-25.7) | 23.9 (22.0-25.8) | 23.7 (21.9-25.7) | <0.0001 |
| BMI group, Kg/m <sup>2</sup>                 |                  |                  |                  | <0.0001 |                  |                  |                  | <0.0001 |
| <18.5                                        | 11070 (6.3)      | 4704 (6.0)       | 6366 (6.5)       |         | 1416 (3.5)       | 460 (3.6)        | 956 (3.4)        |         |
| 18.5-                                        | 84520 (47.8)     | 36535 (46.7)     | 47985 (48.7)     |         | 20259 (49.4)     | 6006 (47.4)      | 14253 (50.3)     |         |
| 24-                                          | 63245 (35.8)     | 28434 (36.4)     | 34811 (35.3)     |         | 15948 (38.9)     | 5129 (40.5)      | 10819 (38.2)     |         |
| 28-                                          | 18017 (10.2)     | 8548 (10.9)      | 9469 (9.6)       |         | 3372 (8.2)       | 1069 (8.4)       | 2303 (8.1)       |         |
| Reperfusion time, mins <sup>b</sup>          |                  |                  |                  | 0.0311  |                  |                  |                  | <0.0001 |
| <60/120                                      | 7210 (3.9)       | 3287 (4.0)       | 3923 (3.8)       |         | 2417 (5.7)       | 808 (6.2)        | 1609 (5.4)       |         |
| 60-119/120-269                               | 39793 (21.3)     | 17602 (21.2)     | 22191 (21.4)     |         | 15750 (36.9)     | 5028 (38.4)      | 10722 (36.2)     |         |
| 120-179/270-359                              | 59545 (31.8)     | 26660 (32.1)     | 32885 (31.6)     |         | 9507 (22.3)      | 2959 (22.6)      | 6548 (22.1)      |         |
| 180-269/360-959                              | 61458 (32.9)     | 27133 (32.7)     | 34325 (33.0)     |         | 13601 (31.8)     | 3924 (30.0)      | 9677 (32.7)      |         |
| 270-360/960-1440                             | 18986 (10.2)     | 8357 (10.1)      | 10629 (10.2)     |         | 1436 (3.4)       | 360 (2.8)        | 1076 (3.6)       |         |
| Thrombolysis drug                            |                  |                  |                  | <0.0001 |                  |                  |                  | ...     |
| Standard r-tPA                               | 75934 (40.1)     | 33008 (39.2)     | 42926 (40.8)     |         | ...              | ...              | ...              |         |
| Suboptimal r-tPA                             | 56424 (29.8)     | 25074 (29.7)     | 31350 (29.8)     |         | ...              | ...              | ...              |         |
| Unknown r-tPA                                | 8276 (4.4)       | 3884 (4.6)       | 4392 (4.2)       |         | ...              | ...              | ...              |         |
| Other drugs                                  | 48885 (25.8)     | 22309 (26.5)     | 26576 (25.3)     |         |                  |                  |                  |         |
| Reperfusion status after<br>EVT <sup>c</sup> |                  |                  | ...              |         |                  |                  |                  | <0.0001 |
| Poor                                         | ...              | ...              | ...              |         | 8134 (18.0)      | 2761 (19.6)      | 5373 (17.3)      |         |
| Good                                         | ...              | ...              | ...              |         | 25639 (56.7)     | 6979 (49.4)      | 18660 (60.0)     |         |
| Unknown                                      | ...              | ...              | ...              |         | 11438 (25.3)     | 4373 (31.0)      | 7065 (22.7)      |         |
| Initial mRS                                  |                  |                  |                  | <0.0001 |                  |                  |                  | <0.0001 |
| 0-2                                          | 100411 (63.7)    | 45348 (67.2)     | 55063 (61.1)     |         | 19599 (50.9)     | 5553 (49.1)      | 14046 (51.7)     |         |
| 3-5                                          | 57161 (36.3)     | 22090 (32.8)     | 35071 (38.9)     |         | 18910 (49.1)     | 5761 (50.9)      | 13149 (48.3)     |         |
| NIHSS score at 24h                           |                  |                  |                  | <0.0001 |                  |                  |                  | <0.0001 |



|                          |               |              |              |         |              |              |              |         |
|--------------------------|---------------|--------------|--------------|---------|--------------|--------------|--------------|---------|
| 0-4                      | 112327 (64.6) | 55424 (75.4) | 56903 (56.7) |         | 7793 (21.0)  | 2768 (27.0)  | 5025 (18.7)  |         |
| 5-9                      | 31240 (18.0)  | 8274 (11.3)  | 22966 (22.9) |         | 7659 (20.6)  | 1333 (13.0)  | 6326 (23.6)  |         |
| 10-14                    | 15895 (9.1)   | 3843 (5.2)   | 12052 (12.0) |         | 7925 (21.4)  | 1293 (12.6)  | 6632 (24.7)  |         |
| 15-20                    | 8729 (5.0)    | 2954 (4.0)   | 5775 (5.7)   |         | 6911 (18.6)  | 1642 (16.0)  | 5269 (19.6)  |         |
| ≥ 21                     | 5692 (3.3)    | 2965 (4.0)   | 2727 (2.7)   |         | 6814 (18.4)  | 3222 (31.4)  | 3592 (13.4)  |         |
| Covid19 pandemic         |               |              |              | 0.0313  |              |              |              | 0.1152  |
| Before                   | 173154 (91.4) | 76867 (91.2) | 96287 (91.5) |         | 41164 (91.1) | 12894 (91.4) | 28270 (90.9) |         |
| During                   | 16365 (8.6)   | 7408 (8.8)   | 8957 (8.5)   |         | 4047 (8.9)   | 1219 (8.6)   | 2828 (9.1)   |         |
| Duration of follow up, d |               |              |              | <0.0001 |              |              |              | <0.0001 |
| 0-6                      | 63150 (33.3)  | 37030 (44.0) | 26120 (24.8) |         | 12921 (28.6) | 7040 (50.1)  | 5881 (18.9)  |         |
| 7-20                     | 116339 (61.4) | 45463 (54.0) | 70876 (67.4) |         | 24983 (55.4) | 5966 (42.4)  | 19071 (61.2) |         |
| 21-                      | 9916 (5.2)    | 1717 (2.0)   | 8199 (7.8)   |         | 7226 (16.0)  | 1059 (7.5)   | 6167 (19.9)  |         |

Abbreviations: BMI, body mass index; IRT, inpatient rehabilitation therapy.

<sup>a</sup> Categorical variables: Frequencies and percentages; Continuous variables with non-normal distributions: Median and interquartile range (IQR).

<sup>b</sup> Left column indicates onset-to-needle time (ONT) in patients with only intravenous thrombolysis; Right column indicates onset-to-puncture time (OPT) in patients with endovascular therapy.

<sup>c</sup> Reperfusion status: classed according to modified TICI score.

**Table6. The structure and contents of IRT in thrombolysis-only and EVT groups**

| Items                                              | Thrombolysis-only group, n(%) | EVT group, n(%) |
|----------------------------------------------------|-------------------------------|-----------------|
| <b>Approaches of IRT</b>                           |                               |                 |
| Acupuncture/massage                                | 66884 (35.3)                  | 21931 (48.5)    |
| Physical therapy                                   | 50528 (26.7)                  | 16871 (37.3)    |
| Occupational therapy                               | 20469 (10.8)                  | 6889 (15.2)     |
| Speech therapy                                     | 24306 (12.9)                  | 8953 (19.8)     |
| Other interventions of rehabilitation <sup>a</sup> | 40908 (21.6)                  | 12683 (28.1)    |
| <b>Model of IRT <sup>b</sup></b>                   |                               |                 |
| Without IRT                                        | 84275 (44.5)                  | 14113 (31.2)    |
| Single intervention                                | 53239 (28.1)                  | 13048 (28.9)    |
| Multimodal intervention                            | 52005 (27.4)                  | 18050 (39.9)    |
| <b>Rehabilitation locations <sup>c</sup></b>       |                               |                 |
| Only bedside                                       | 83534 (80.5)                  | 24401 (79.2)    |
| Inpatient rehabilitation center                    | 20288 (19.5)                  | 6394 (20.8)     |

Abbreviations: EVT, endovascular therapy; IRT, inpatient rehabilitation therapy.

<sup>a</sup> Other interventions of rehabilitation included cognitive training, swallowing therapy, psychotherapy, or physiotherapy based on traditional Chinese medicine.

<sup>b</sup> Single intervention for patients with only one approach; Multimodal intervention for patients with 2-5 approaches.

<sup>c</sup> Number and percentages was for proportions of locations and calculated in patients with IRT. Inpatient rehabilitation center included patients trained in inpatient rehabilitation center, with our without bedside rehabilitation therapy

**TableS7. Demographic and clinical characteristics of patients with thrombolysis-only and endovascular therapy after PSM**

|                | Thrombolysis-only group   |                        |         | Endovascular therapy group |                      |         |
|----------------|---------------------------|------------------------|---------|----------------------------|----------------------|---------|
|                | Without IRT<br>(N= 56923) | With IRT<br>(N= 56923) | P value | Without IRT<br>(N=7710)    | With IRT<br>(N=7710) | P value |
| Age, y         | 66 (57-74)                | 66 (57-74)             | 0.3511  | 66 (56-74)                 | 66 (57-74)           | 0.5909  |
| Age group, y   |                           |                        | 0.8403  |                            |                      | 0.4993  |
| 14-40          | 1257 (2.2)                | 1219 (2.1)             |         | 215 (3.3)                  | 277 (3.6)            |         |
| 41-60          | 17647 (31.0)              | 17519 (30.8)           |         | 2308 (29.9)                | 2232 (29.0)          |         |
| 61-70          | 18687 (32.8)              | 18761 (33.0)           |         | 2469 (32.0)                | 2500 (32.4)          |         |
| 71-80          | 14035 (24.7)              | 14110 (24.8)           |         | 1943 (25.2)                | 1981 (26.0)          |         |
| 81-99          | 5297 (9.3)                | 5314 (9.3)             |         | 739 (9.6)                  | 720 (9.3)            |         |
| Sex, Male      | 36816 (64.7)              | 36855 (64.8)           | 0.8098  | 4910 (63.7)                | 4924 (63.9)          | 0.8145  |
| Region         |                           |                        | 0.4699  |                            |                      | 0.5860  |
| Northeast      | 6489 (11.4)               | 6330 (11.1)            |         | 878 (11.4)                 | 896 (11.6)           |         |
| North          | 12696 (22.3)              | 12809 (22.5)           |         | 904 (11.7)                 | 878 (11.4)           |         |
| East           | 16344 (28.7)              | 16282 (28.6)           |         | 2528 (32.8)                | 2434 (31.6)          |         |
| Central        | 10449 (18.4)              | 10364 (18.2)           |         | 1196 (15.5)                | 1211 (15.7)          |         |
| South          | 3000 (5.3)                | 3119 (5.5)             |         | 1029 (13.4)                | 1050 (13.6)          |         |
| Southwest      | 5454 (9.6)                | 5507 (9.7)             |         | 758 (9.8)                  | 812 (10.5)           |         |
| Northwest      | 2491 (4.4)                | 2512 (4.4)             |         | 417 (5.4)                  | 429 (5.6)            |         |
| Hospital level |                           |                        | 0.8745  |                            |                      | 0.7190  |
| Class A        | 29224 (51.3)              | 29275 (51.4)           |         | 6607 (85.7)                | 6642 (86.2)          |         |
| Class B        | 8151 (14.3)               | 8091 (14.2)            |         | 622 (8.1)                  | 601 (7.8)            |         |
| Class C        | 19548 (34.3)              | 19557 (34.4)           |         | 481 (6.2)                  | 467 (6.1)            |         |
| TOAST          |                           |                        | 0.6706  |                            |                      | 0.6179  |
| LAA            | 26624 (46.8)              | 26872 (47.2)           |         | 4552 (59.0)                | 4603 (59.7)          |         |

|                                     |                  |                  |         |                  |                  |        |
|-------------------------------------|------------------|------------------|---------|------------------|------------------|--------|
| CE                                  | 5627 (9.9)       | 5614 (9.9)       |         | 2432 (31.5)      | 2429 (31.5)      |        |
| SAO                                 | 21924 (38.5)     | 21723 (38.2)     |         | 322 (4.2)        | 316 (4.1)        |        |
| SOC                                 | 415 (0.7)        | 416 (0.7)        |         | 124 (1.6)        | 112 (1.5)        |        |
| SUC                                 | 2333 (4.1)       | 2298 (4.0)       |         | 280 (3.6)        | 250 (3.2)        |        |
| BMI, Kg/m <sup>2</sup>              | 23.7 (21.5-26.0) | 23.7 (21.5-26.0) | 0.9744  | 23.9 (22.0-25.8) | 23.8 (22.0-25.8) | 0.6432 |
| Reperfusion time, mins              | 165 (119-220)    | 165 (118-220)    | 0.7454  | 285 (200-402)    | 289 (195-405)    | 0.6873 |
| Reperfusion time, mins <sup>b</sup> |                  |                  | 0.0859  |                  |                  | 0.4978 |
| <60/120                             | 2260 (4.0)       | 2194 (3.9)       |         | 502 (6.5)        | 466 (6.0)        |        |
| 60-119/120-269                      | 12138 (21.3)     | 12381 (21.8)     |         | 2944 (38.2)      | 3007 (39.0)      |        |
| 120-179/270-359                     | 18272 (32.1)     | 17975 (31.6)     |         | 1705 (22.1)      | 1687 (21.9)      |        |
| 180-269/360-959                     | 18642 (32.8)     | 18599 (32.7)     |         | 2332 (30.3)      | 2346 (30.4)      |        |
| 270-360/960-1440                    | 5611 (9.9)       | 5773 (10.1)      |         | 227 (2.9)        | 204 (2.7)        |        |
| Thrombolysis drug                   |                  |                  | 0.9623  |                  |                  |        |
| Standard r-tPA                      | 23944 (42.1)     | 23857 (41.9)     |         | ...              | ...              | ...    |
| Suboptimal r-tPA                    | 17994 (31.6)     | 18039 (31.7)     |         | ...              | ...              | ...    |
| Unknown r-tPA                       | 476 (0.8)        | 481 (0.9)        |         | ...              | ...              | ...    |
| Other drugs                         | 14509 (25.5)     | 14546 (25.6)     |         | ...              | ...              | ...    |
| Reperfusion status after            |                  |                  | ...     |                  |                  | 0.9835 |
| EVT                                 |                  |                  |         |                  |                  |        |
| Poor                                | ...              | ...              |         | 1676 (21.7)      | 1678 (21.8)      |        |
| Good                                | ...              | ...              |         | 4510 (58.5)      | 4500 (58.4)      |        |
| Unknown                             |                  |                  |         | 1524 (19.8)      | 1532 (19.9)      |        |
| EVT type                            |                  |                  | ...     |                  |                  | 0.0772 |
| BT                                  | ...              | ...              |         | 2384 (30.9)      | 2486 (32.2)      |        |
| Direct EVT                          | ...              | ...              |         | 5326 (69.1)      | 5224 (67.8)      |        |
| Initial NIHSS score                 | 5 (3-9)          | 5 (3-9)          | <0.0001 | 15 (10-21)       | 15 (10-21)       | 0.1356 |

|                               |              |              |         |             |             |        |
|-------------------------------|--------------|--------------|---------|-------------|-------------|--------|
| Initial NIHSS score           |              |              | 0.6766  |             |             | 0.9418 |
| 0-4                           | 24753 (47.0) | 26547 (46.6) |         | 656 (8.5)   | 659 (8.6)   |        |
| 5-9                           | 16802 (29.5) | 16847 (29.6) |         | 1064 (13.8) | 1095 (14.2) |        |
| 10-14                         | 6920 (12.2)  | 7061 (12.4)  |         | 1780 (23.1) | 1778 (23.1) |        |
| 15-20                         | 4019 (7.1)   | 4025 (7.1)   |         | 2152 (27.9) | 2156 (28.0) |        |
| ≥21                           | 2429 (4.3)   | 2443 (4.3)   |         | 2058 (26.7) | 2022 (26.2) |        |
| Initial mRS                   | 1 (0-3)      | 1 (0-3)      | 0.0064  | 3 (0-4)     | 3 (0-4)     | 0.0133 |
| NIHSS score at 24h            | 2 (0-5)      | 2 (1-5)      | <0.0001 | 12 (4-21)   | 12 (4-21)   | 0.9519 |
| NIHSS score at 24h            |              |              | 0.8426  |             |             | 0.7536 |
| 0-4                           | 41941 (73.7) | 41806 (73.4) |         | 2188 (28.4) | 2213 (28.7) |        |
| 5-9                           | 7200 (12.7)  | 7286 (12.8)  |         | 1119 (14.5) | 1158 (15.0) |        |
| 10-14                         | 3340 (5.9)   | 3402 (6.0)   |         | 1052 (13.6) | 1068 (13.9) |        |
| 15-20                         | 2452 (4.3)   | 2459 (4.3)   |         | 1342 (17.4) | 1313 (17.0) |        |
| ≥ 21                          | 1990 (3.5)   | 1970 (3.5)   |         | 2009 (26.1) | 1958 (25.4) |        |
| ΔNIHSS24h                     |              |              | 0.3126  |             |             | 0.8534 |
| Moderate-Severe deterioration | 1857 (3.3)   | 1760 (3.1)   |         | 1154 (15.0) | 1126 (14.6) |        |
| Mild deterioration            | 1909 (3.4)   | 1953 (3.4)   |         | 468 (6.1)   | 469 (6.1)   |        |
| Stable                        | 12896 (22.7) | 13084 (23.0) |         | 1936 (25.1) | 1905 (24.7) |        |
| Mild improvement              | 34668 (60.9) | 34526 (60.7) |         | 2368 (30.7) | 2428 (31.5) |        |
| RNI                           | 5593 (9.8)   | 5600 (9.8)   |         | 1784 (23.1) | 1782 (23.1) |        |
| Antiplatelet within 48h       |              |              | 0.7808  |             |             | 0.5895 |
| No                            | 2566 (4.5)   | 2573 (4.5)   |         | 711 (9.2)   | 697 (9.0)   |        |
| Yes                           | 48268 (84.8) | 48334 (84.9) |         | 5256 (68.2) | 5315 (68.9) |        |
| Unknown                       | 6089 (10.7)  | 6016 (10.6)  |         | 1743 (22.6) | 1698 (22.0) |        |
| Statin                        |              |              | 0.0051  |             |             | 0.8268 |

|                          |              |              |         |             |             |         |
|--------------------------|--------------|--------------|---------|-------------|-------------|---------|
| No                       | 2666 (4.7)   | 2470 (4.3)   |         | 1251 (16.2) | 1241 (16.1) |         |
| Yes                      | 54257 (95.3) | 54453 (95.7) |         | 6459 (83.8) | 6469 (83.9) |         |
| ICH                      |              |              | 0.9434  |             |             | 0.8486  |
| No                       | 55293 (97.1) | 55289 (97.1) |         | 6962 (90.3) | 6969 (90.4) |         |
| Yes                      | 1630 (2.9)   | 1634 (2.9)   |         | 748 (9.7)   | 741 (9.6)   |         |
| GIH                      |              |              | 0.4887  |             |             | 1.0000  |
| No                       | 56574 (99.4) | 56592 (99.4) |         | 7681 (99.6) | 7681 (99.6) |         |
| Yes                      | 349 (0.6)    | 331 (0.6)    |         | 29 (0.4)    | 29 (0.4)    |         |
| Duration of follow up, d | 8 (5-11)     | 9 (6-13)     | <0.0001 | 8 (3-12)    | 12 (7-18)   | <0.0001 |
| Covid19 pandemic         |              |              | 0.6163  |             |             | 0.9510  |
| Before                   | 52363 (92.0) | 52317 (91.9) |         | 7138 (92.6) | 7136 (92.6) |         |
| During                   | 4560 (8.0)   | 4606 (8.1)   |         | 572 (7.4)   | 574 (7.4)   |         |

Abbreviations: BT, bridging thrombolysis; CE, cardioembolism; DET, direct endovascular therapy; GIH, gastrointestinal hemorrhage; ICH, intracranial hemorrhage; IRT, inpatient rehabilitation therapy; LAA, large artery atherosclerosis; mRS, modified ranking score; NIHSS, National Institutes of Health Stroke Scale; RNI, rapid neurological improvement; SAO, small artery occlusion; SOC, stroke of other determined cause; SUC, stroke of undetermined cause.

<sup>a</sup> Categorical variables: Frequencies and percentages; Continuous variables with non-normal distributions: Median and interquartile range (IQR).

<sup>b</sup> Left column indicates onset-to-needle time (ONT) in patients with only intravenous thrombolysis; Right column indicates onset-to-puncture time (OPT) in patients with endovascular therapy.

**TableS8. HRs for all-cause in-hospital mortality in subgroup analyses in patients with only thrombolysis and EVT**

|                                | Patients with events/total patients, no. (%) |                 | Hazard Ratio (95% CI) | P value |
|--------------------------------|----------------------------------------------|-----------------|-----------------------|---------|
|                                | IRT-                                         | IRT+            |                       |         |
| <b>Thrombolysis-only group</b> |                                              |                 |                       |         |
| Overall                        | 1908/84275 (2.3)                             | 667/105244(0.6) | 0.20 (0.19-0.22)      |         |
| Sex                            |                                              |                 |                       | 0.6123  |
| Male                           | 1094/54479 (2.0)                             | 371/67320 (0.6) | 0.20 (0.18-0.22)      |         |
| Female                         | 814/29793 (2.7)                              | 296/37922 (0.8) | 0.21 (0.18-0.24)      |         |
| Systolic Pressure at admission |                                              |                 |                       | 0.003   |
| < 160 mmHg                     | 1036/52190 (2.0)                             | 382/62874 (0.6) | 0.23 (0.20-0.26)      |         |
| ≥ 160 mmHg                     | 871/32066 (2.7)                              | 284/42351 (0.7) | 0.18 (0.15-0.20)      |         |
| Region                         |                                              |                 |                       | 0.0320  |
| Northeast                      | 477/11707 (4.1)                              | 67/8752 (0.8)   | 0.15 (0.11-0.19)      |         |
| North                          | 314/20493 (1.5)                              | 72/18444 (0.4)  | 0.19 (0.14-0.24)      |         |
| East                           | 438/22636 (1.9)                              | 162/31252 (0.5) | 0.19 (0.16-0.23)      |         |
| Central                        | 258/13754 (1.9)                              | 119/19261 (0.6) | 0.24 (0.19-0.30)      |         |
| South                          | 106/4195 (2.5)                               | 80/8885 (0.9)   | 0.24 (0.18-0.32)      |         |
| Southwest                      | 211/7909 (2.7)                               | 130/13489 (1.0) | 0.24 (0.19-0.30)      |         |
| Northwest                      | 104/3581 (2.9)                               | 37/5161 (0.7)   | 0.17 (0.12-0.25)      |         |
| Hospital level                 |                                              |                 |                       | 0.2876  |
| Class A                        | 172/40838 (3.1)                              | 487/58268 (0.8) | 0.20 (0.18-0.23)      |         |
| Class B                        | 222/12101 (1.8)                              | 73/14405 (0.5)  | 0.20 (0.15-0.26)      |         |
| Class C                        | 414/31312 (1.3)                              | 107/32566 (0.3) | 0.17 (0.14-0.22)      |         |
| TOAST                          |                                              |                 |                       | 0.5855  |
| LAA                            | 1042/39231 (2.7)                             | 357/53957 (0.7) | 0.18 (0.16-0.20)      |         |
| CE                             | 594/8755 (6.8)                               | 229/11890 (1.9) | 0.19 (0.16-0.22)      |         |
| SAO                            | 133/30970 (0.4)                              | 47/35014 (0.1)  | 0.21 (0.14-0.29)      |         |
| SOC                            | 20/689 (2.9)                                 | 5/780 (0.6)     | 0.17 (0.06-0.45)      |         |
| SUC                            | 119/4615 (2.6)                               | 29/3585 (0.8)   | 0.22 (0.15-0.34)      |         |
| Initial NIHSS score            |                                              |                 |                       | 0.2392  |
| 0-4                            | 170/38688 (0.4)                              | 41/36311 (0.1)  | 0.18 (0.12-0.25)      |         |
| 5-9                            | 260/22614 (1.2)                              | 103/34863 (0.3) | 0.19 (0.15-0.25)      |         |
| 10-14                          | 375/10631 (3.5)                              | 153/18777 (0.8) | 0.15 (0.13-0.19)      |         |
| 15-20                          | 512/6702 (7.6)                               | 190/9912 (1.9)  | 0.15 (0.13-0.18)      |         |
| 21-                            | 543/4752 (11.9)                              | 173/4695 (3.7)  | 0.18 (0.15-0.21)      |         |
| Initial mRS                    |                                              |                 |                       | 0.0023  |
| 0-2                            | 629/45348 (1.4)                              | 231/55063 (0.4) | 0.22 (0.19-0.26)      |         |
| 3-5                            | 884/22090 (4.0)                              | 351/35071 (1.0) | 0.18 (0.16-0.20)      |         |
| NIHSS score at 24h             |                                              |                 |                       | <0.0001 |
| 0-4                            | 88/55424 (0.2)                               | 52/56903 (0.1)  | 0.43 (0.30-0.61)      |         |
| 5-9                            | 110/8274 (1.3)                               | 71/22966 (0.3)  | 0.16 (0.12-0.22)      |         |
| 10-20                          | 481/6797 (7.1)                               | 274/17827 (1.5) | 0.14 (0.12-0.16)      |         |

|                                |                   |                 |                  |         |
|--------------------------------|-------------------|-----------------|------------------|---------|
| 21-                            | 572/2965 (19.3)   | 200/2727 (7.3)  | 0.20 (0.17-0.24) |         |
| Thrombolysis drug              |                   |                 |                  | 0.0003  |
| Standard r-tPA                 | 827/33008 (2.5)   | 266/42926 (0.6) | 0.18 (0.16-0.21) |         |
| Suboptimal r-tPA               | 602/25074 (2.4)   | 267/31350 (0.9) | 0.25 (0.22-0.30) |         |
| Unknown r-tPA                  | 103/3884 (2.7)    | 31/4392 (0.7)   | 0.19 (0.13-0.29) |         |
| Other drugs                    | 376/22309 (1.7)   | 103/26576 (0.4) | 0.16 (0.13-0.21) |         |
| Statin                         |                   |                 |                  | <0.0001 |
| No                             | 745/8429 (8.8)    | 110/3602 (3.1)  | 0.19 (0.15-0.23) |         |
| Yes                            | 1057/72841 (1.5)  | 521/97735 (0.5) | 0.27 (0.24-0.30) |         |
| Covid19 pandemic               |                   |                 |                  |         |
| Before                         | 1680/76867 (2.2)  | 592/96287 (0.6) | 0.21 (0.19-0.23) | 0.6623  |
| During                         | 228/7408 (3.1)    | 75/8957 (0.8)   | 0.19 (0.15-0.25) |         |
| <hr/>                          |                   |                 |                  |         |
| EVT group                      |                   |                 |                  |         |
| Sex                            |                   |                 |                  | 0.5031  |
| Male                           | 1027/8854 (11.6)  | 372/20111 (1.9) | 0.11 (0.10-0.12) |         |
| Female                         | 680/5259 (12.9)   | 262/10986 (2.4) | 0.12 (0.10-0.14) |         |
| Systolic Pressure at admission |                   |                 |                  | 0.1563  |
| < 160 mmHg                     | 1041/9407 (11.1)  | 370/21124 (1.8) | 0.11 (0.09-0.12) |         |
| ≥ 160 mmHg                     | 666/4703 (14.2)   | 263/9969 (2.6)  | 0.12 (0.11-0.14) |         |
| Region                         |                   |                 |                  | 0.0020  |
| Northeast                      | 343/1553 (22.1)   | 78/2112 (3.7)   | 0.12 (0.09-0.15) |         |
| North                          | 172/1797 (9.6)    | 45/2575 (1.8)   | 0.15 (0.11-0.21) |         |
| East                           | 438/4910 (8.9)    | 156/10673 (1.5) | 0.10 (0.09-0.13) |         |
| Central                        | 208/1927 (10.8)   | 94/4558 (2.1)   | 0.13 (0.10-0.17) |         |
| South                          | 263/1855 (14.2)   | 117/5721 (2.1)  | 0.09 (0.07-0.11) |         |
| Southwest                      | 144/1324 (10.9)   | 106/3669 (2.9)  | 0.17 (0.13-0.22) |         |
| Northwest                      | 139/747 (18.6)    | 38/1790 (2.1)   | 0.08 (0.06-0.11) |         |
| Hospital level                 |                   |                 |                  | 0.1164  |
| Class A                        | 1492/11890 (12.6) | 573/26777 (2.1) | 0.12 (0.11-0.13) |         |
| Class B                        | 138/1275 (10.8)   | 47/2820 (1.7)   | 0.09 (0.06-0.13) |         |
| Class C                        | 77/947 (8.1)      | 14/1501 (0.9)   | 0.07 (0.04-0.13) |         |
| TOAST                          |                   |                 |                  | 0.0383  |
| LAA                            | 991/8374 (11.8)   | 346/19375 (1.8) | 0.10 (0.09-0.12) |         |
| CE                             | 615/4224 (14.6)   | 250/8945 (2.8)  | 0.12 (0.10-0.14) |         |
| SAO                            | 29/569 (5.1)      | 10/1425 (0.7)   | 0.12 (0.06-0.24) |         |
| SOC                            | 22/235 (9.4)      | 10/475 (2.1)    | 0.16 (0.08-0.35) |         |
| SUC                            | 50/699 (7.2)      | 18/870 (2.1)    | 0.22 (0.13-0.38) |         |
| EVT type                       |                   |                 |                  | 0.0395  |
| BT                             | 564/4033 (14.0)   | 197/9157 (2.2)  | 0.10 (0.08-0.12) |         |
| Direct EVT                     | 1143/10080 (11.3) | 437/21941 (2.0) | 0.12 (0.11-0.14) |         |
| Initial NIHSS score            |                   |                 |                  | 0.6347  |
| 0-4                            | 40/1023 (3.9)     | 17/2010 (0.9)   | 0.16 (0.09-0.30) |         |
| 5-9                            | 83/1560 (5.3)     | 43/4558 (0.9)   | 0.12 (0.08-0.18) |         |



|                    |                   |                 |                  |        |
|--------------------|-------------------|-----------------|------------------|--------|
| 10-14              | 288/2889 (10.0)   | 122/8442 (1.5)  | 0.11 (0.08-0.13) |        |
| 15-20              | 519/3803 (13.7)   | 215/9130 (2.4)  | 0.11 (0.09-0.13) |        |
| 21-                | 704/3954 (17.8)   | 222/6135 (3.6)  | 0.12 (0.10-0.14) |        |
| Initial mRS        |                   |                 |                  | 0.5064 |
| 0-2                | 644/5553 (11.6)   | 272/14046 (1.9) | 0.11 (0.10-0.13) |        |
| 3-5                | 783/5761 (13.6)   | 292/13149 (2.2) | 0.11 (0.10-0.13) |        |
| NIHSS score at 24h |                   |                 |                  | 0.1984 |
| 0-4                | 15/2768 (0.5)     | 9/5025 (0.2)    | 0.25 (0.10-0.64) |        |
| 5-9                | 46/1333 (3.5)     | 43/6326 (0.7)   | 0.15 (0.10-0.23) |        |
| 10-20              | 315/2935 (10.7)   | 206/11901 (1.7) | 0.11 (0.09-0.13) |        |
| 21-                | 743/3222 (23.1)   | 245/3592 (6.8)  | 0.16 (0.14-0.18) |        |
| Statin             |                   |                 |                  | 0.7315 |
| No                 | 692/3626 (19.1)   | 128/2429 (5.3)  | 0.15 (0.12-0.18) |        |
| Yes                | 883/9378 (9.4)    | 447/26898 (1.7) | 0.13 (0.11-0.14) |        |
| Covid19 pandemic   |                   |                 |                  | 0.9504 |
| Before             | 1535/12894 (11.9) | 568/28270 (2.0) | 0.11 (0.10-0.13) |        |
| During             | 172/1219 (14.1)   | 66/2828 (2.3)   | 0.11 (0.08-0.15) |        |

Abbreviations: BT, bridging thrombolysis; CE, cardioembolism; DET, direct endovascular therapy; EVT, endovascular therapy; ICH, intracranial hemorrhage; IRT, inpatient rehabilitation therapy; LAA, large artery atherosclerosis; mRS, modified ranking score; NIHSS, National Institutes of Health Stroke Scale; SAO, small artery occlusion; SOC, stroke of other determined cause; SUC, stroke of undetermined cause.

**TableS9. Clinical characteristics of patients with initial NIHSS score  $\geq$  21**

|                | Thrombolysis-only group |                  | EVT group            |                  |
|----------------|-------------------------|------------------|----------------------|------------------|
|                | No. of patients, (%)    | No. of death,(%) | No. of patients, (%) | No. of death,(%) |
| Age group      |                         |                  |                      |                  |
| < 65y/75y      | 1979 (21.4)             | 112 (5.7)        | 7116 (70.5)          | 590 (8.3)        |
| $\geq$ 65y/75y | 7252 (78.6)             | 604 (8.3)        | 2972 (29.5)          | 336 (11.6)       |
| ICH            |                         |                  |                      |                  |
| No             | 8467 (91.7)             | 608 (7.2)        | 8986 (89.1)          | 732 (8.2)        |
| Yes            | 764 (8.3)               | 108 (14.1)       | 1100 (10.9)          | 189 (17.2)       |

Note: The number and percentage of age $\geq$ 65 in thrombolysis-only group were 105069 (55.7%);the number and percentage of age $\geq$ 75 in EVT group were 10514 (23.3%).

**TableS10. Sensitivity analyses of Cox regression models in patients with only thrombolysis****a. Cox regression model in patients with follow-up time  $\geq$  1 days**

|      |             | Unadjusted       |         | Adjusted <sup>aa</sup> |         |
|------|-------------|------------------|---------|------------------------|---------|
|      | Event, n(%) | HR (95% CI)      | p Value | HR (95% CI)            | p Value |
| IRT- | 1270 (1.7)  | 1 (Reference)    | NA      | 1 (Reference)          | NA      |
| IRT+ | 599 (0.6)   | 0.26 (0.23-0.29) | <0.0001 | 0.19 (0.17-0.21)       | <0.0001 |

<sup>aa</sup> The model adjusted for patient age, hospital level, TOAST, reperfusion time, use of antiplatelet within 48h, use of statin, NIHSS score at 24h, NIHSS score change at 24h, and intracranial hemorrhage, shown in eTable5 in the supplement. 159929 patients were included in multi-variable model.

**b. Cox regression model in patients with follow-up time  $\leq$  6 days**

|      |             | Unadjusted       |         | Adjusted <sup>bb</sup> |         |
|------|-------------|------------------|---------|------------------------|---------|
|      | Event, n(%) | HR (95% CI)      | p Value | HR (95% CI)            | p Value |
| IRT- | 1517 (4.1)  | 1 (Reference)    | NA      | 1 (Reference)          | NA      |
| IRT+ | 355 (1.4)   | 0.28 (0.25-0.31) | <0.0001 | 0.36 (0.31-0.41)       | <0.0001 |

<sup>bb</sup> The model adjusted for patient age, hospital level, TOAST, reperfusion time, use of antiplatelet within 48h, use of statin, NIHSS score at 24h, NIHSS score change at 24h, and intracranial hemorrhage, shown in eTable5 in the supplement. 51135 patients were included in multi-variable model.

**c. Time-dependent Cox regression model**

|      |             | Unadjusted       |         | Adjusted <sup>cc</sup> |         |
|------|-------------|------------------|---------|------------------------|---------|
|      | Event, n(%) | HR (95% CI)      | p Value | HR (95% CI)            | p Value |
| IRT- | 1908 (2.3)  | 1 (Reference)    | NA      | 1 (Reference)          | NA      |
| IRT+ | 667 (0.6)   | 0.20 (0.19-0.22) | <0.0001 | 0.19 (0.17-0.22)       | <0.0001 |

<sup>cc</sup> The time-dependent Cox regression model adjusted for patient age, hospital level, TOAST, reperfusion time, use of antiplatelet within 48h, use of statin, NIHSS score at 24h, NIHSS score change at 24h, and intracranial hemorrhage, shown in eTable5 in the supplement and sex, region, covid19 pandemic, and thrombolysis drug. 141012 patients were included in multi-variable model.

**TableS11. Sensitivity analyses of Cox regression models in patients with EVT**a. Cox regression model in patients with follow-up time  $\geq 1$  days

|      |             | Unadjusted       |         | Adjusted <sup>aa</sup> |         |
|------|-------------|------------------|---------|------------------------|---------|
|      | Event, n(%) | HR (95% CI)      | p Value | HR (95% CI)            | p Value |
| IRT- | 1298 (10.8) | 1 (Reference)    | NA      | 1 (Reference)          | NA      |
| IRT+ | 561 (1.9)   | 0.13 (0.11-0.14) | <0.0001 | 0.13 (0.12-0.15)       | <0.0001 |

<sup>aa</sup> The model adjusted for patient age, hospital level, TOAST, reperfusion time, reperfusion status, use of antiplatelet within 48h, use of statin, NIHSS score at 24h, NIHSS score change at 24h, and intracranial hemorrhage, shown in eTable6 in the supplement. 31956 patients were included in multi-variable model.

b. Cox regression model in patients with follow-up time  $\leq 6$  days

|      |             | Unadjusted       |         | Adjusted <sup>bb</sup> |         |
|------|-------------|------------------|---------|------------------------|---------|
|      | Event, n(%) | HR (95% CI)      | p Value | HR (95% CI)            | p Value |
| IRT- | 1342 (19.1) | 1 (Reference)    | NA      | 1 (Reference)          | NA      |
| IRT+ | 312 (5.3)   | 0.19 (0.17-0.21) | <0.0001 | 0.27 (0.23-0.32)       | <0.0001 |

<sup>bb</sup> The model adjusted for patient age, hospital level, TOAST, reperfusion time, reperfusion status, use of antiplatelet within 48h, use of statin, NIHSS score at 24h, NIHSS score change at 24h, and intracranial hemorrhage, shown in eTable6 in the supplement. 8855 patients were included in multi-variable model.

## c. Time-dependent Cox regression model

|      |             | Unadjusted       |         | Adjusted <sup>cc</sup> |         |
|------|-------------|------------------|---------|------------------------|---------|
|      | Event, n(%) | HR (95% CI)      | p Value | HR (95% CI)            | p Value |
| IRT- | 1707 (12.1) | 1 (Reference)    | NA      | 1 (Reference)          | NA      |
| IRT+ | 634 (2.0)   | 0.11 (0.10-0.13) | <0.0001 | 0.13 (0.12-0.15)       | <0.0001 |

<sup>cc</sup> The model adjusted for patient age, hospital level, TOAST, reperfusion time, reperfusion status, use of antiplatelet within 48h, use of statin, NIHSS score at 24h, NIHSS score change at 24h, and intracranial hemorrhage, shown in eTable6 in the supplement, and sex, region, covid19 pandemic and EVT intervention type (bridging thrombolysis vs. direct endovascular therapy). 30268 patients were included in multi-variable model.

**TableS12. Confounders of Cox regression model in thrombolysis-only group**

| Items                     | Details                                                                                                                                               |
|---------------------------|-------------------------------------------------------------------------------------------------------------------------------------------------------|
| Age group                 | (1) 14-60 years; (2) 61-80 years; (3) 71-99 years                                                                                                     |
| Hospital level            | (1) Class-A hospitals; (2) Class-B hospitals; (3) Class-C hospitals                                                                                   |
| TOAST                     | (1) Large artery atherosclerosis, or cardioembolism;(2) small artery occlusion, or stroke of other determined cause, or stroke of undetermined cause; |
| Reperfusion time          | (1) ONT $\leq$ 149 mins; (2) ONT $\geq$ 150mins                                                                                                       |
| Antiplatelet within 48h   | (1) No, or Unknown; (2) Yes                                                                                                                           |
| Statin                    | (1) No; (2) Yes                                                                                                                                       |
| NIHSS score at 24h        | (1) 0-7; (2) $\geq$ 8                                                                                                                                 |
| NIHSS score change at 24h | (1) Severe deterioration; (2) Non-severe deterioration                                                                                                |
| Intracranial hemorrhage   | (1) No; (2) Yes                                                                                                                                       |

**TableS13. Confounders of Cox regression model in EVT group**

| Items                     | Details                                                                                                                                               |
|---------------------------|-------------------------------------------------------------------------------------------------------------------------------------------------------|
| Age group                 | (1) 14-60 years; (2) 61-80 years; (3) 81-99 years                                                                                                     |
| Hospital level            | (1) Class-A hospitals; (2) Class-B hospitals, or Class-C hospitals                                                                                    |
| TOAST                     | (1) Large artery atherosclerosis, or cardioembolism;(2) Small artery occlusion, or stroke of other determined cause, or stroke of undetermined cause; |
| Reperfusion time          | (1) OPT $\leq$ 269 mins; (2) OPT $\geq$ 270mins                                                                                                       |
| Reperfusion status        | (1) modified TICI: 0,1, or 2a; (2) modified TICI: 2b or 3; (3)Unknown                                                                                 |
| Antiplatelet within 48h   | (1) No, or Unknown; (2) Yes                                                                                                                           |
| Statin                    | (1) No; (2) Yes                                                                                                                                       |
| NIHSS score at 24h        | (1) 0-7; (2) $\geq$ 8                                                                                                                                 |
| NIHSS score change at 24h | (1) Severe deterioration; (2) Non-severe deterioration                                                                                                |
| Intracranial hemorrhage   | (1) No; (2) Yes                                                                                                                                       |

FigureS1. Data source of our study

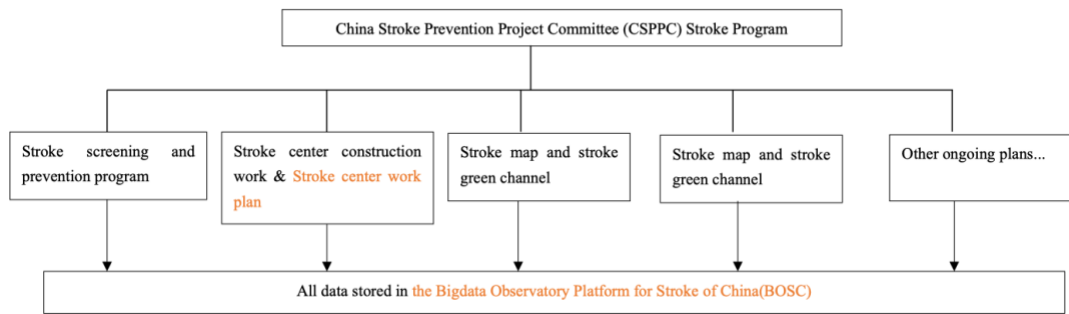

Note: All data of the CSPPC Stroke Program are collected and stored in the Bigdata Observatory Platform for Stroke of China (BOSC, <https://www.chinasdc.cn>).

FigureS2. The distribution of propensity scores in unmatched and matched patients in thrombolysis-only group

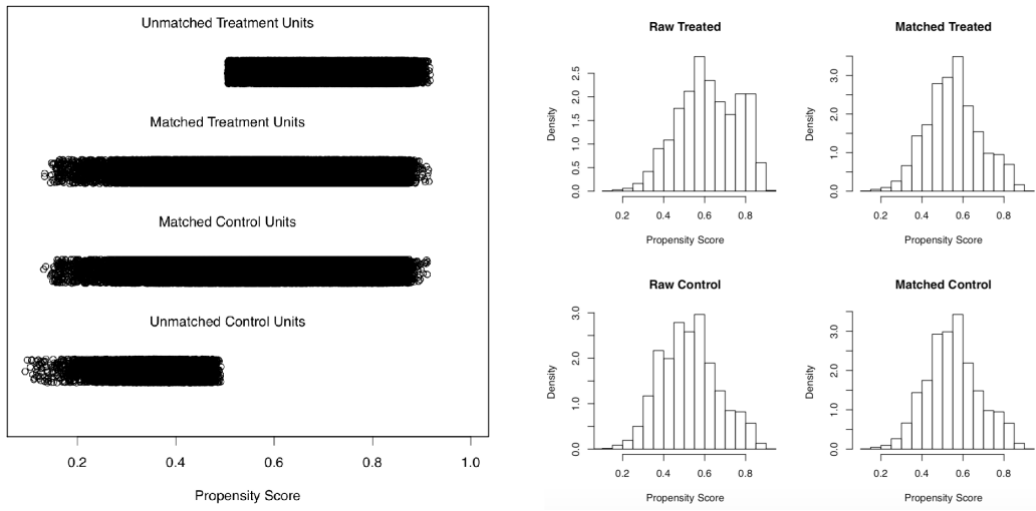



FigureS3. The distribution of propensity scores in unmatched and matched patients in EVT group

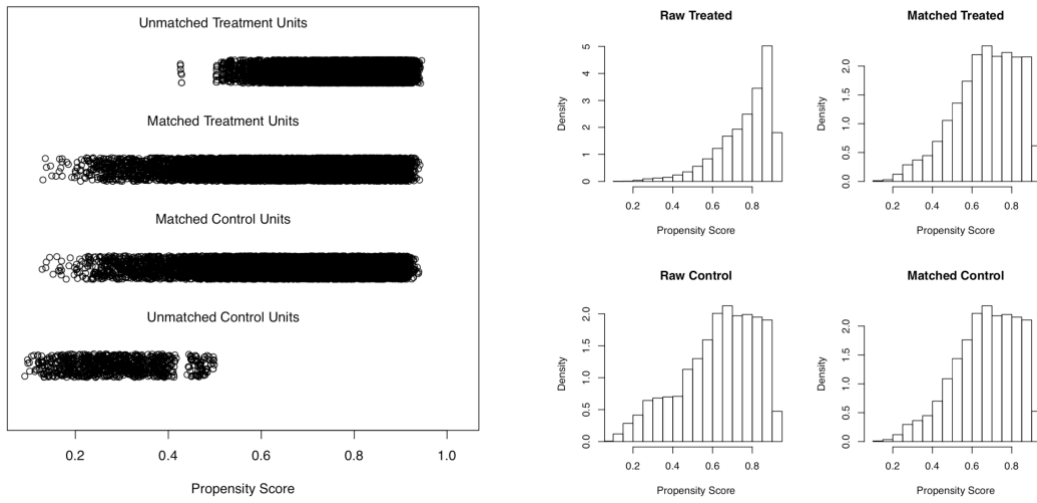

Supplement: Data_Sheet_1.pdf [file Data_Sheet_1.pdf]
